# Supplementary material for: Association of allergic rhinitis with obstructive sleep apnea: A meta-analysis
Source: PubMed Central journal article supplement (PMC6319794; doi:10.1097/md.0000000000013783), 2018-12-21
Supplement: medi-97-e13783-s001.pdf [file medi-97-e13783-s001.pdf]

Fig. S1 Forest graph showing the overall prevalence of AR in Asia, and other continents (Europe, Oceania, and America).

Fig. S2 Forest graph showing the mean difference between OSA adults with AR and without AR in BMI, neck circumference, AHI an

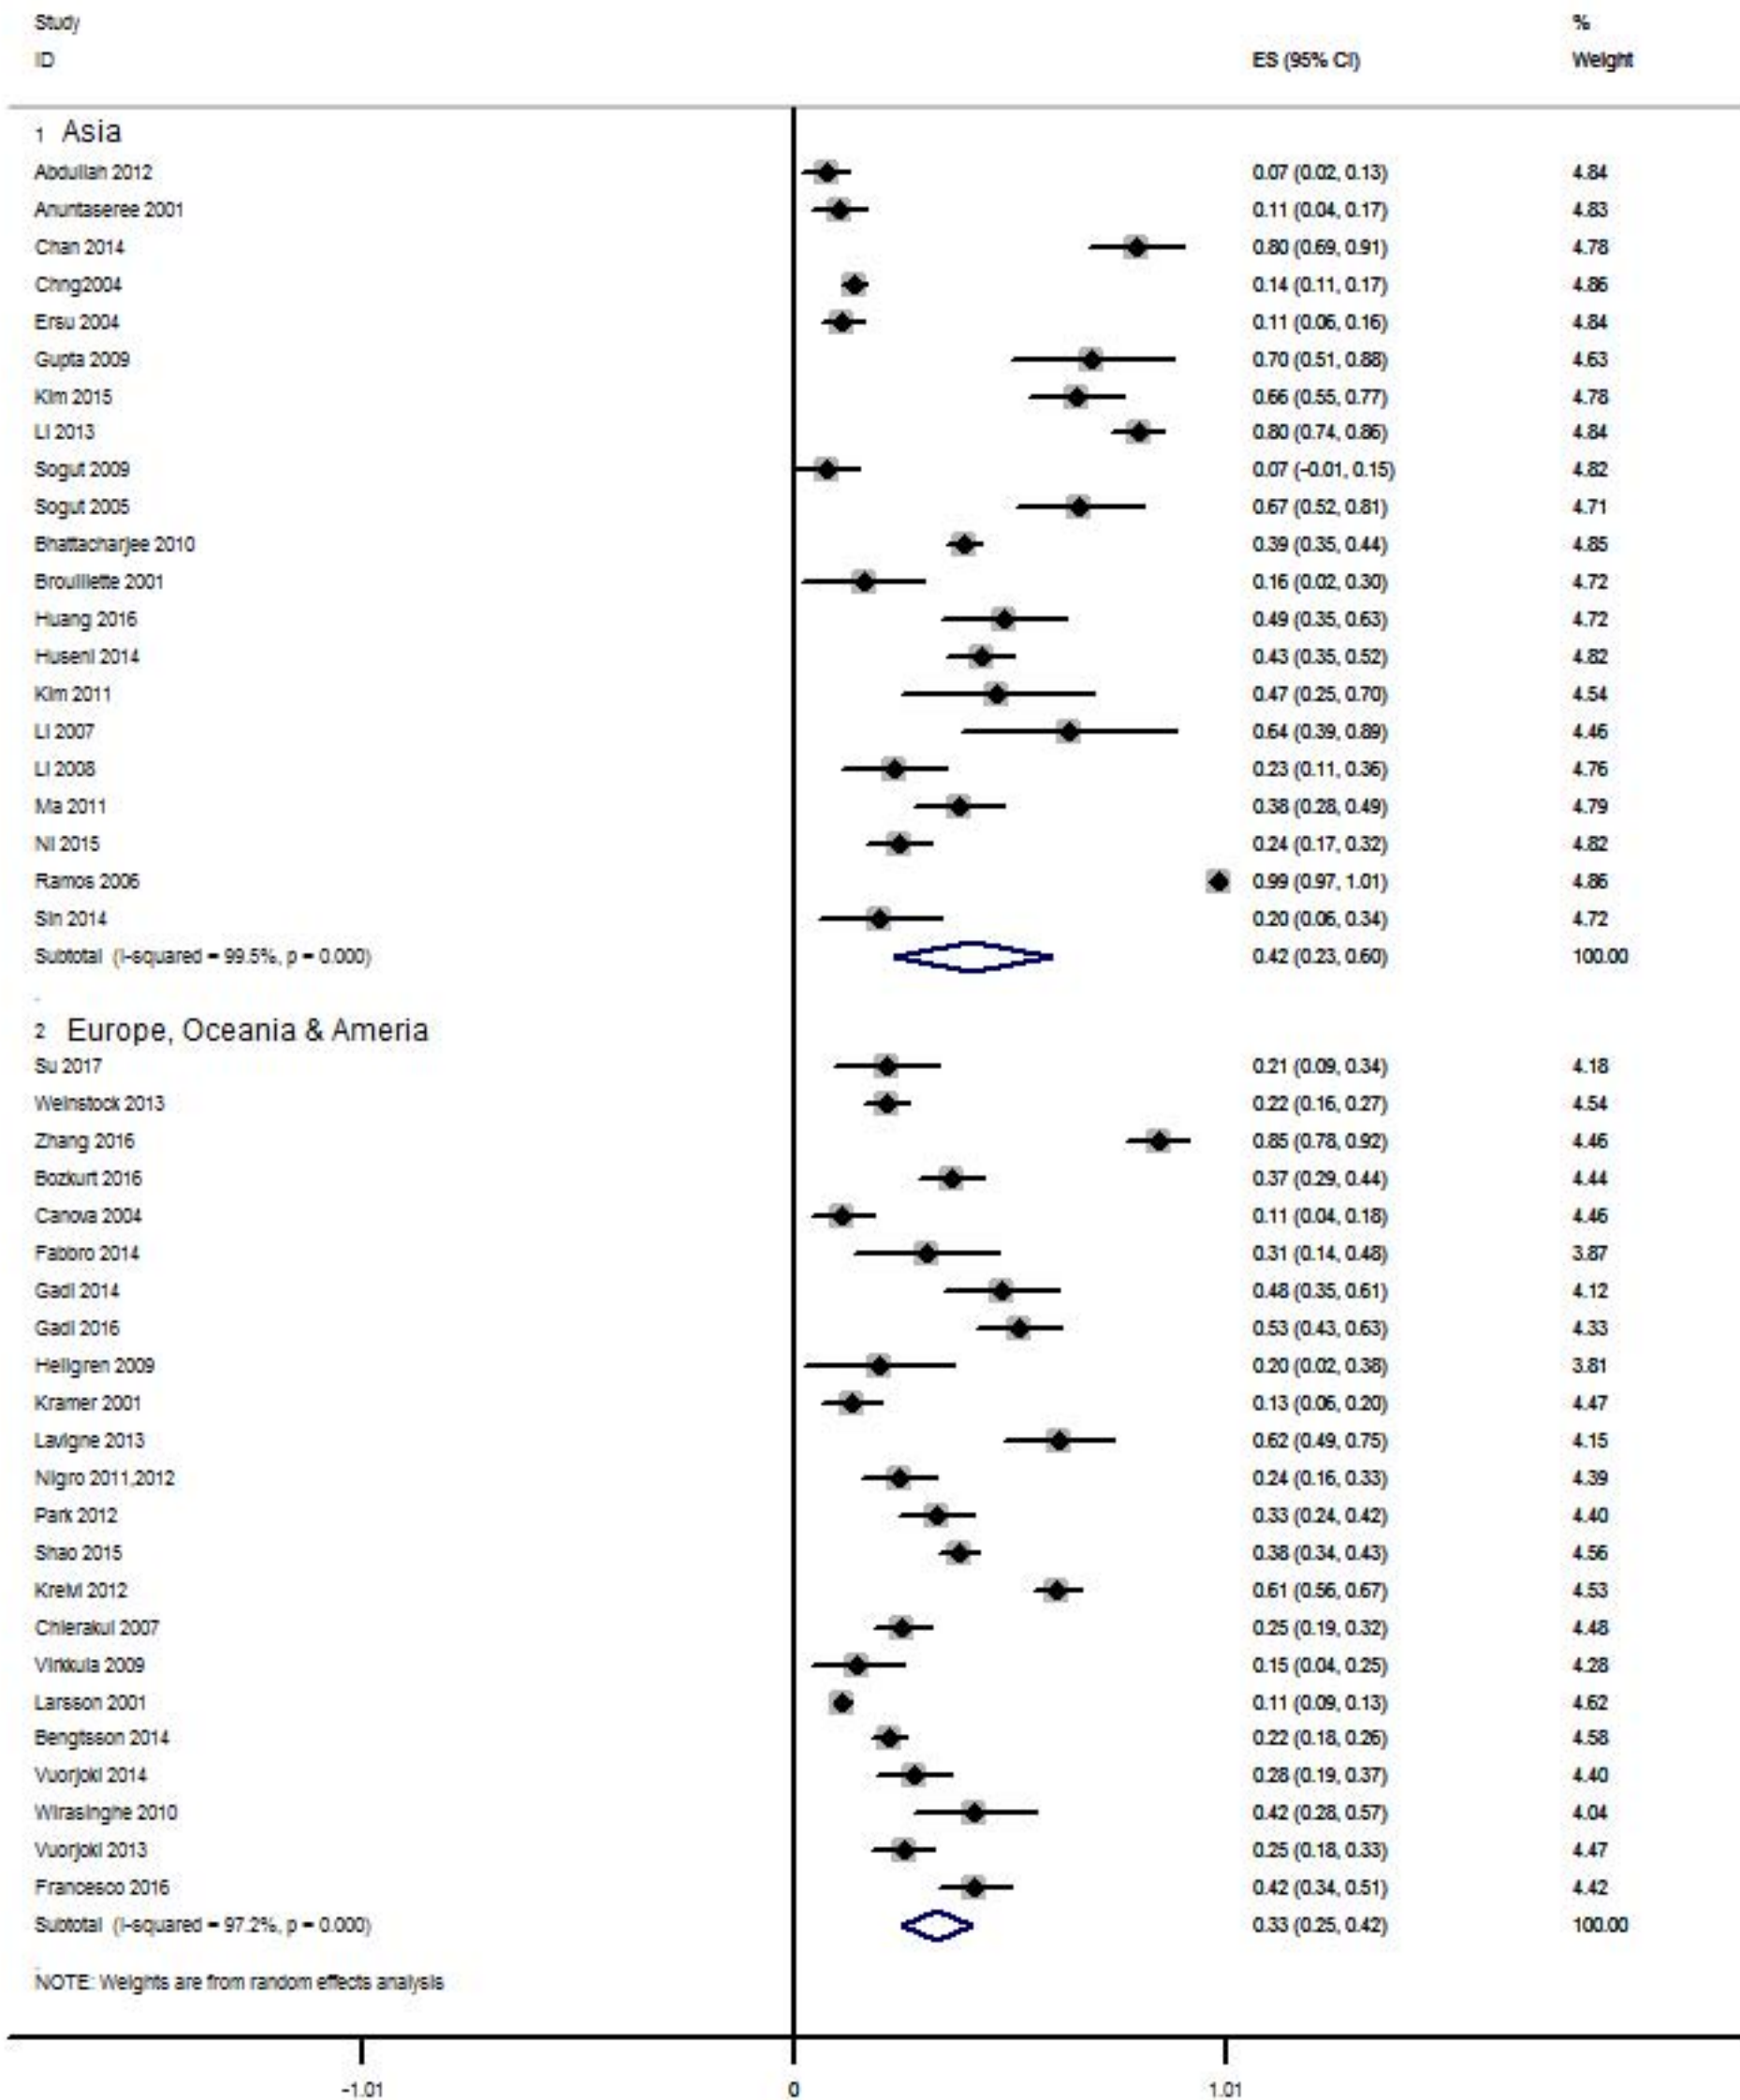



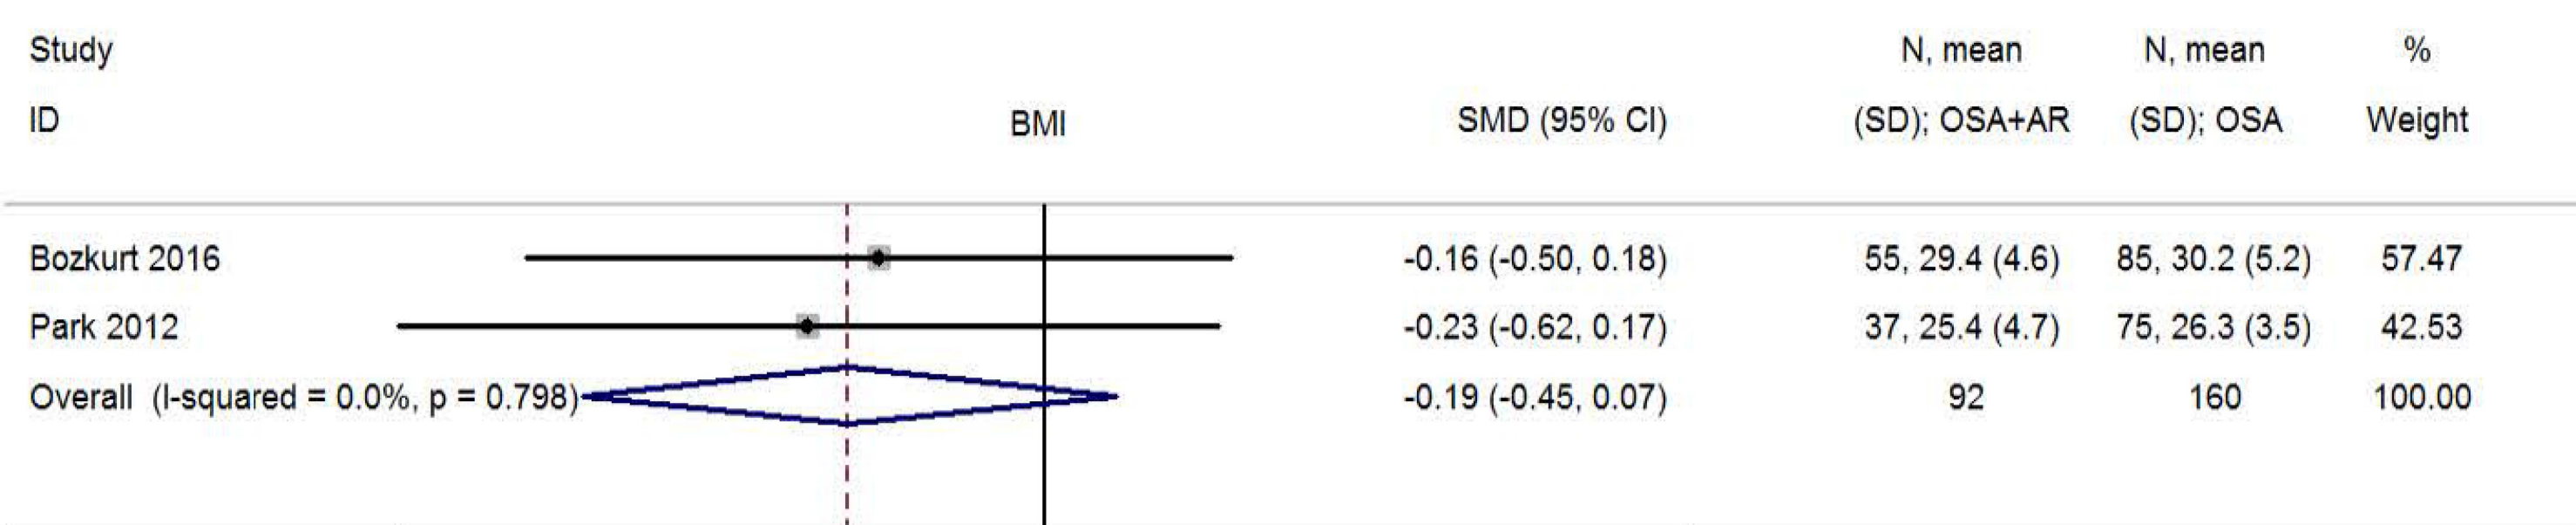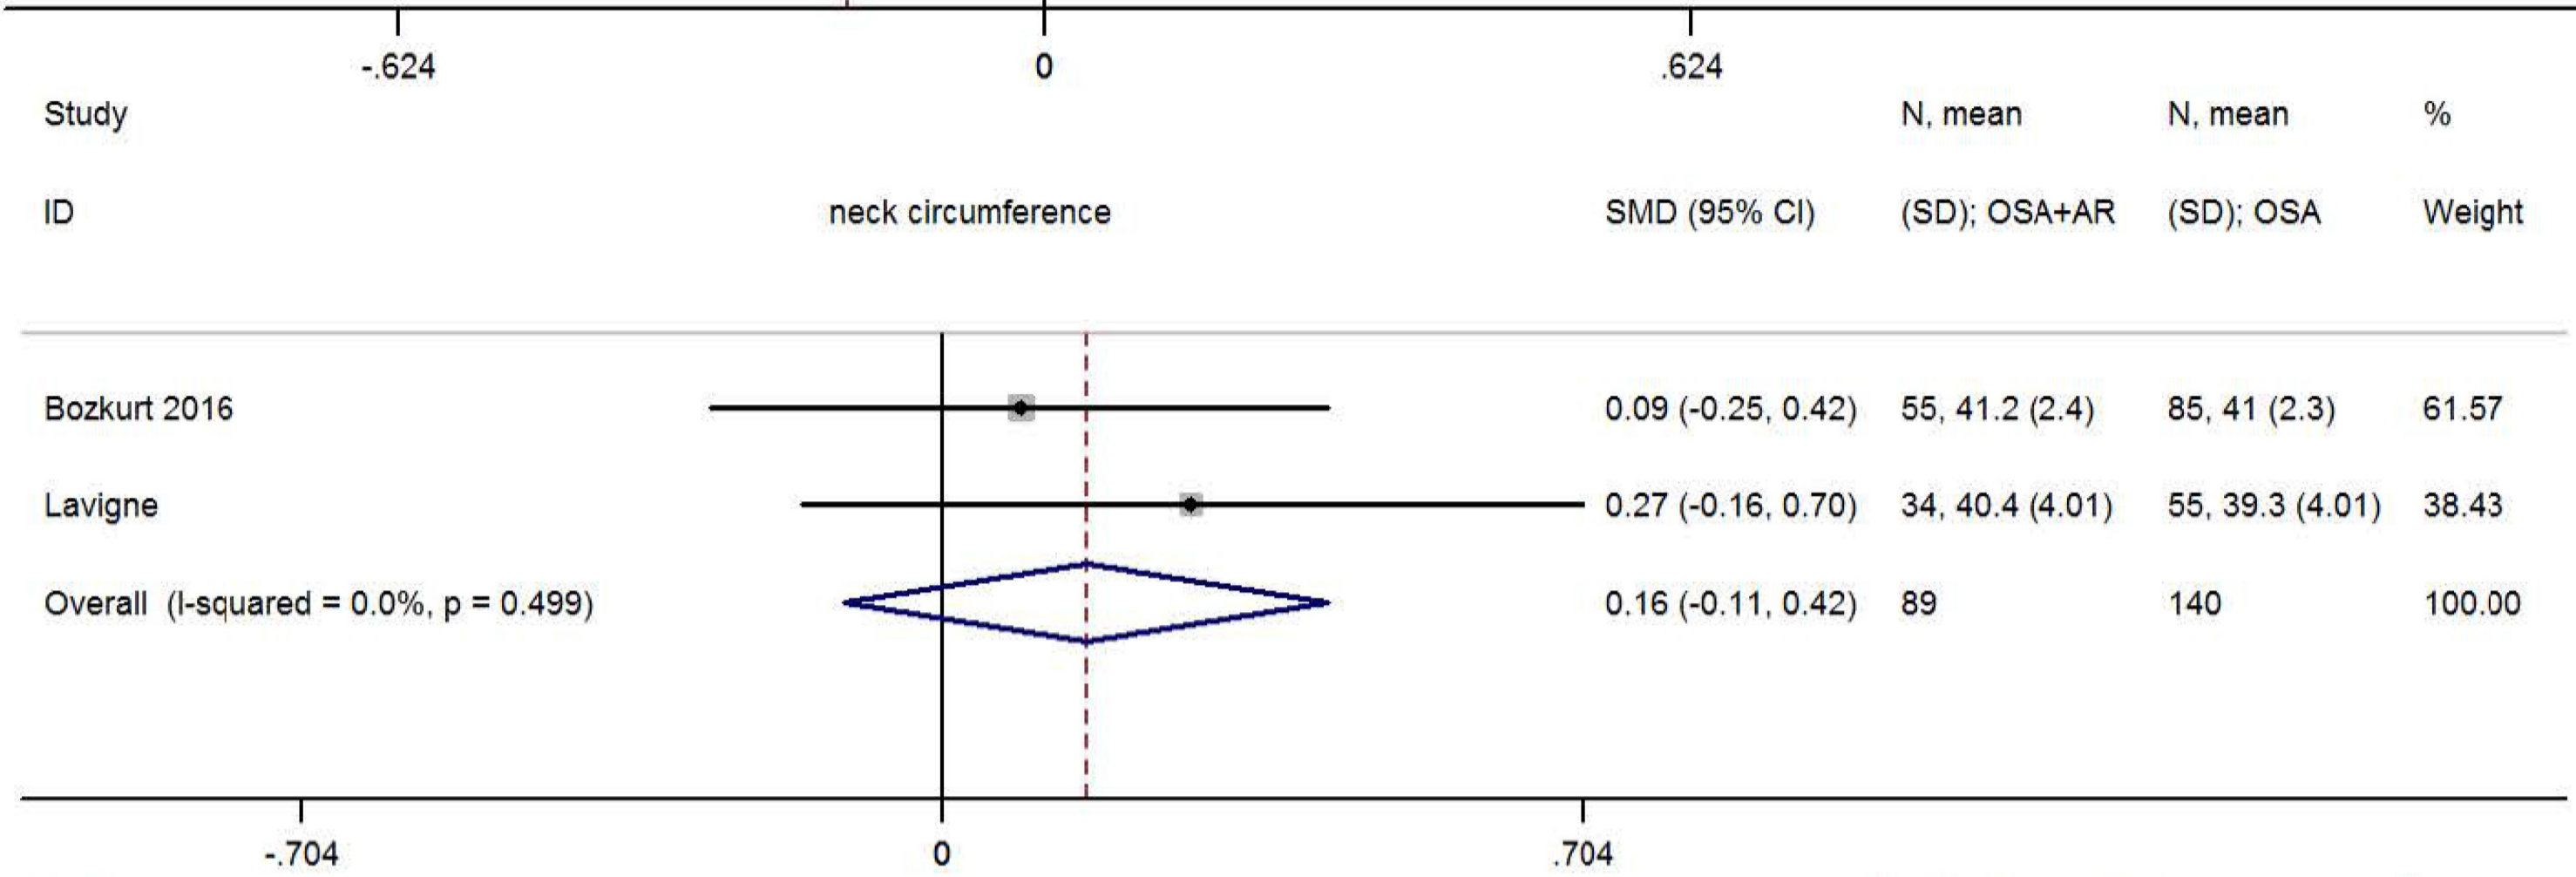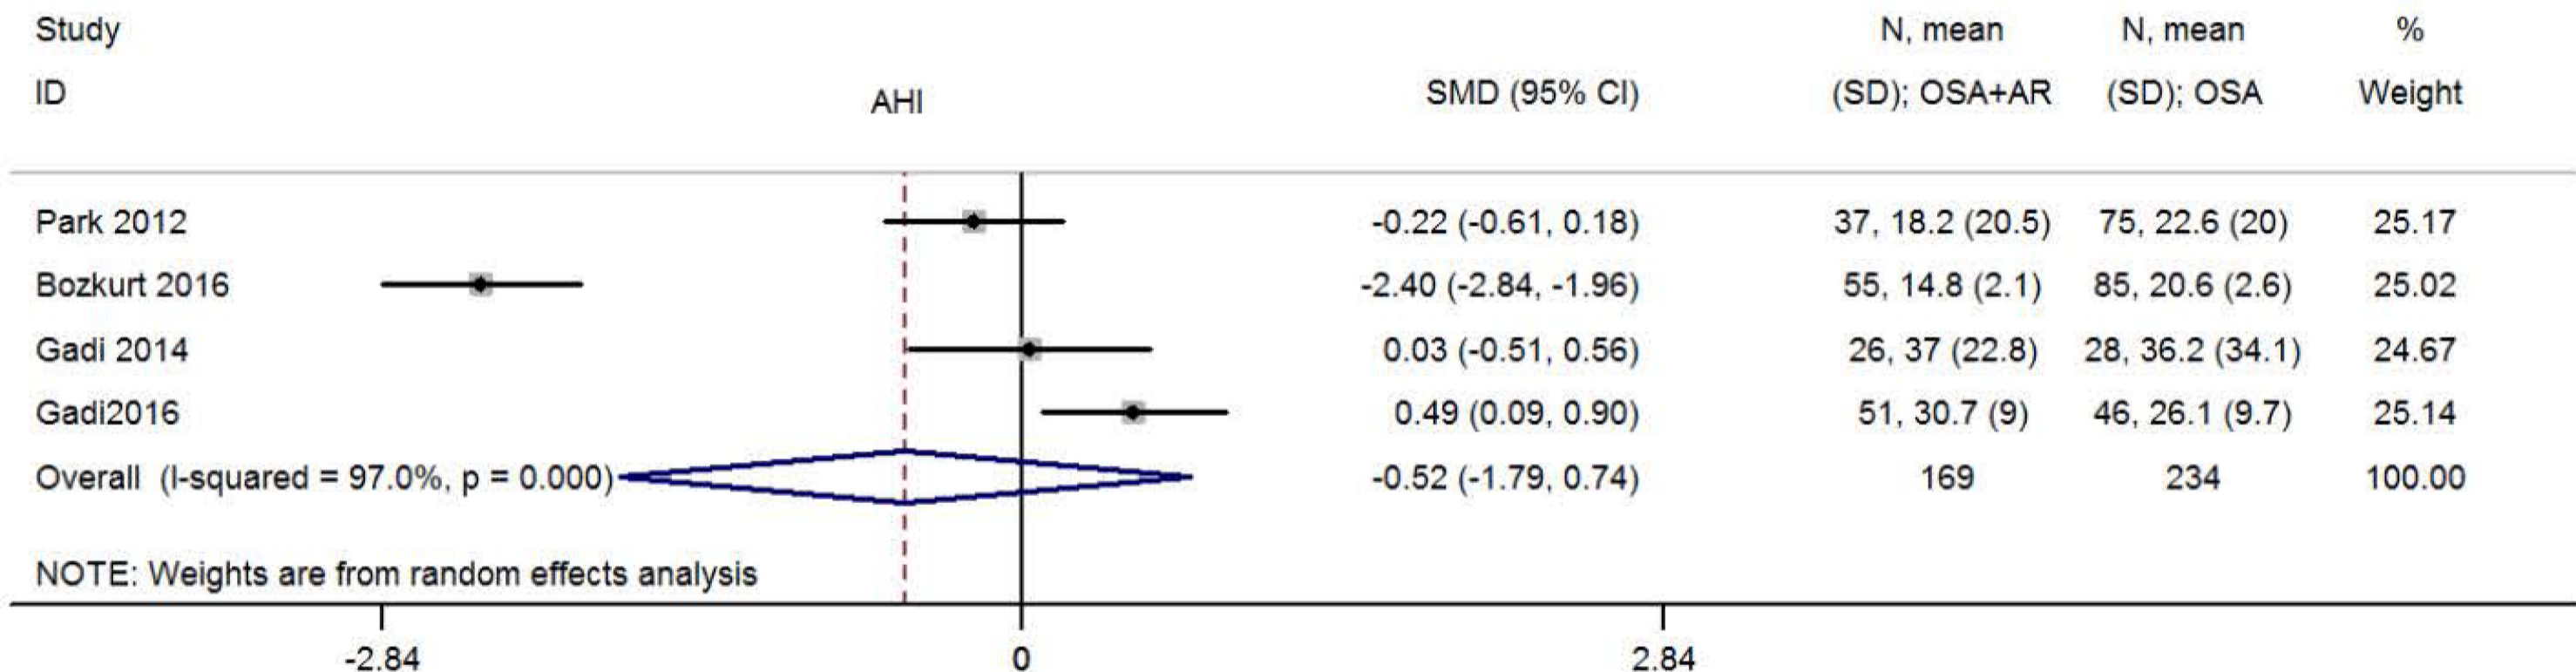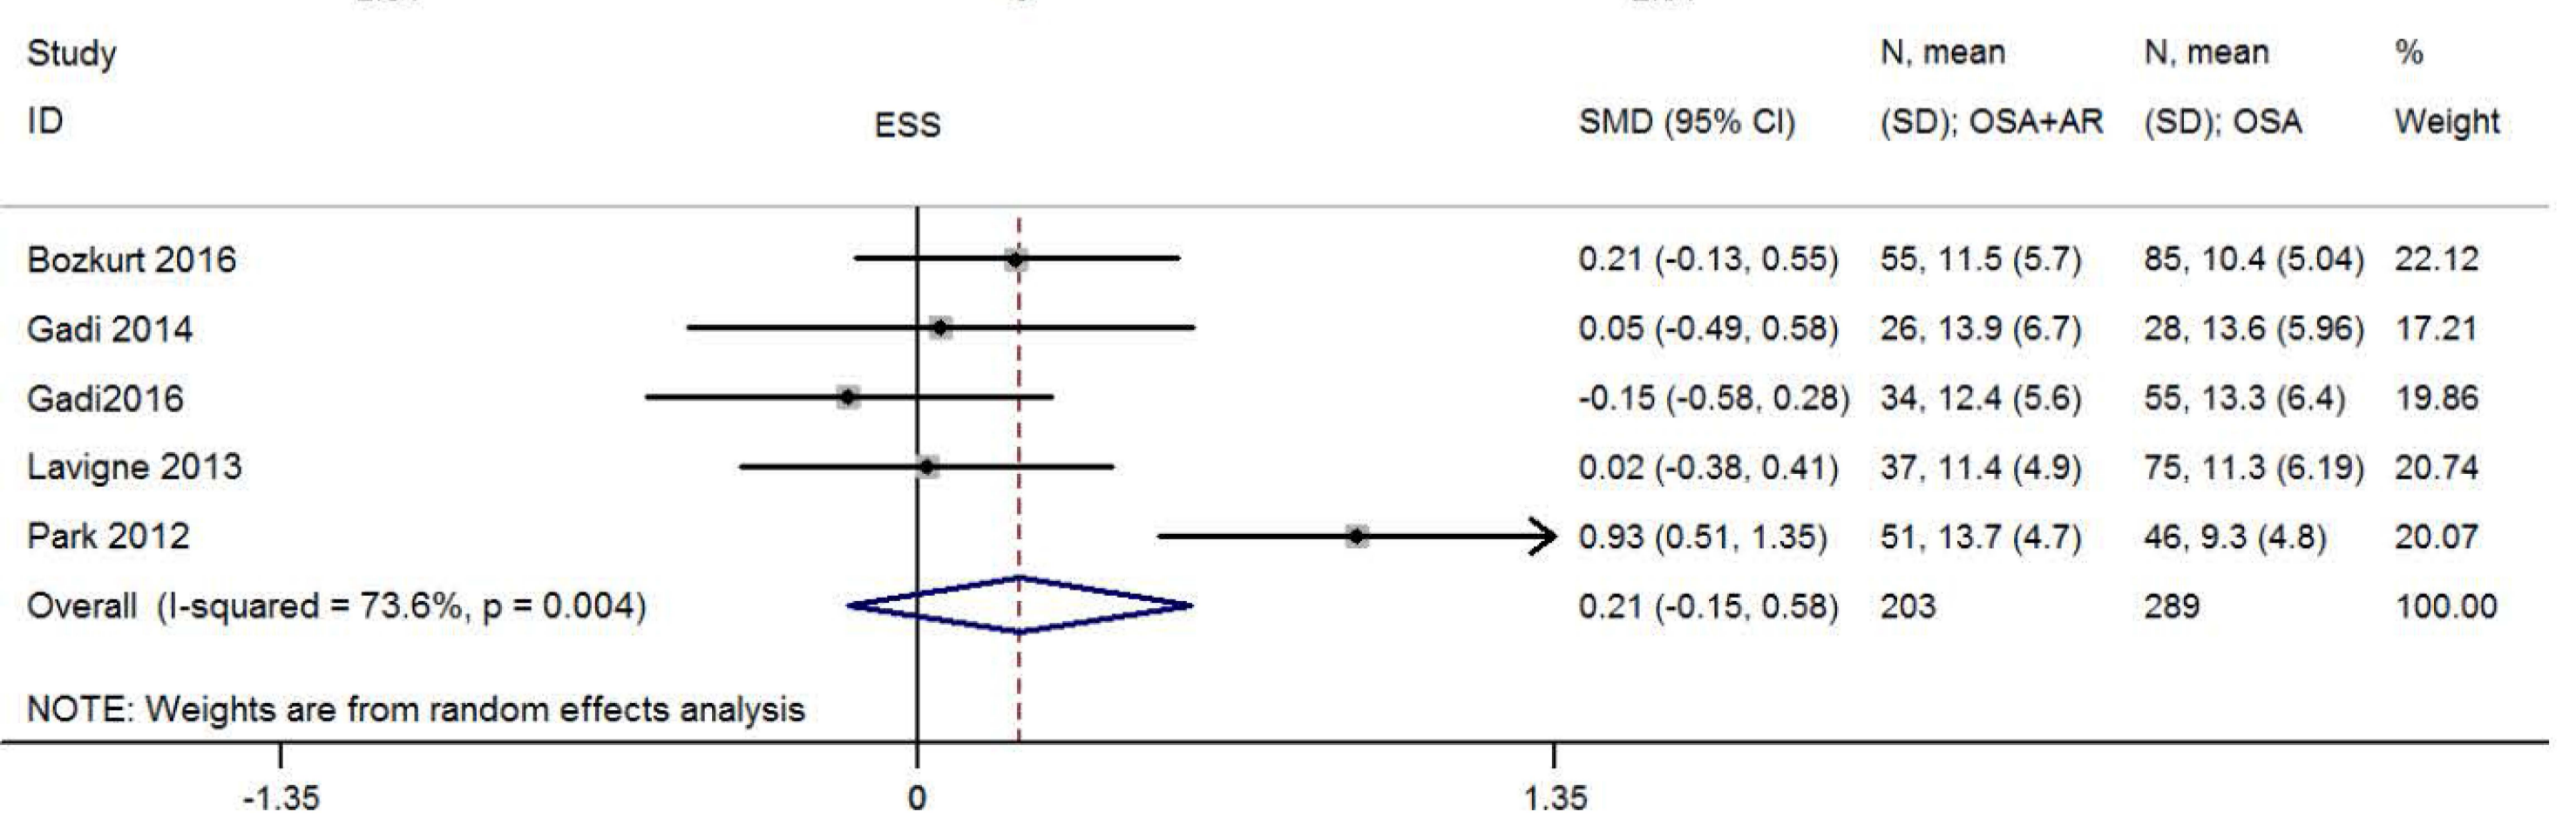

NOTE: Weights are from random effects analysis

NOTE: Weights are from random effects analysis
